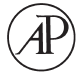

## List of referees

The editors would like to thank all those listed below for their assistance in refereeing papers submitted for inclusion in the Symposium proceedings.

Will Ambrose  
Ole Norden Andersen  
Wolf Arntz  
Christos Arvanitides  
Brendan Ball  
Job Baretta  
David Basford  
John Baxter  
Magda Bergman  
Jery Blackford  
Jean-Yves Bodion  
Slan Boyd  
Andy Brand  
Thomas Brey  
Jim Carlton  
Gian Carlo Carrada  
R. Cattaneo-Vietti  
Kathleen E. Conlan  
Marc Costello  
Roberto Danovaro  
S. J. de Groot  
Ian Dixon  
Gerhard Duineveld

Anastasios Eleftheriou  
Mike Elliot  
Karel Essink  
Jan Helge Fossaa  
Bob Foster-Smith  
Don Gordon  
Jon Grant  
Steve Hall  
Dan Harries  
Hans Hillewaert  
Beth Irlandi  
Peter Jones  
Ioannis Karakassis  
Paul Kingston  
Drossos Koutsoubas  
Rikk Kvitek  
Lisa Levin  
Hamish Mair  
Donald McLusky  
Derek Moore  
Geoff Moore  
Jon Moore  
Artemis Nicolaidou

Nadia K. Papadopoulou  
Tom Pearson  
Deborah Penry  
Charles H. Peterson  
Nancy Rabalais  
Eike Rachor  
Dave Raffaelli  
Hubert Rees  
Courtney Richmond  
Martin Riddle  
Mike Robertson  
Heye Rumohr  
Matt Service  
Chris J. Smith  
Mark Tasker  
Phil Taylor  
Trevor Telfer  
James Thomas  
Richard M. Warwick  
Les Watling  
Don Weston
